# Supplementary material
Source: Springer Nature journal article supplement (https://www.springermedizin.de/resource/supplementary/12939_2006_69_MOESM3_ESM.pdf/9551422)

□ RR skilled delivery attendance    ■ RR no skilled delivery attendance

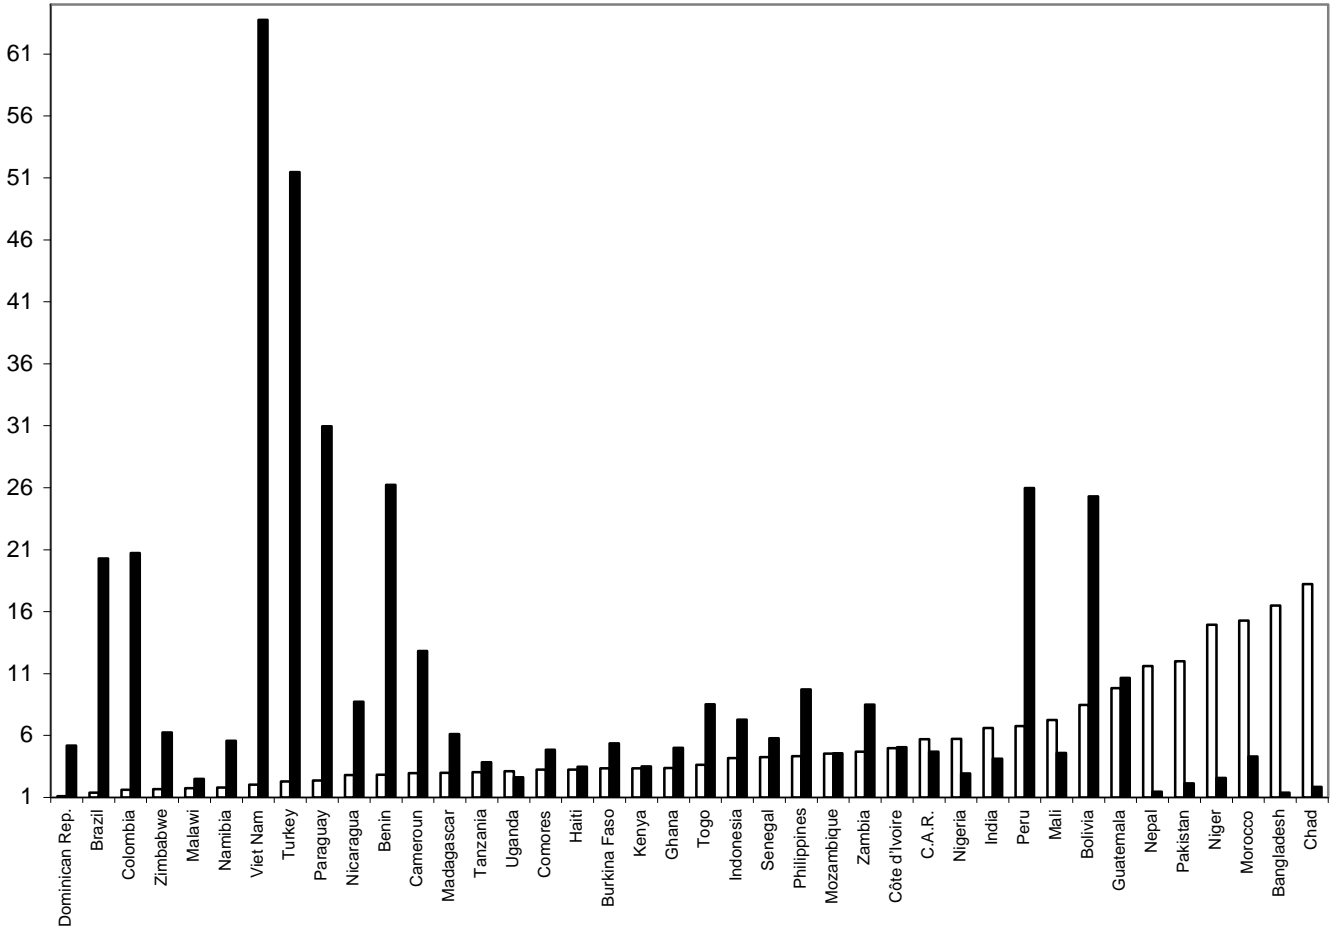

Supplement: MOESM3 [file 9551422]
